# Supplementary material
Source: PubMed Central journal article supplement (PMC4554192)

**Supplementary Table 1.** HER2 antibodies and specifications.

| <b>Antibody</b> | <b>Vendor</b>             | <b>Species-Type</b> | <b>Optimized titer (concentration)</b> | <b>Dynamic range (AU) / R<sup>2</sup></b> | <b>Target within HER2</b> |
|-----------------|---------------------------|---------------------|----------------------------------------|-------------------------------------------|---------------------------|
| CB11            | Biocare Medical           | Mouse monoclonal    | 1:1000 (10.4 ng/ml)                    | 261.8-13302.3 / 0.98                      | Intracellular domain      |
| A0485           | Dako                      | Rabbit polyclonal   | 1:10000                                | 119.6-13304.4 / 0.95                      | Intracellular domain      |
| SP3             | Spring Bioscience         | Rabbit monoclonal   | 1:100 (indeterminable as produced)     | 135.5-6837.70 / 0.91                      | Extracellular domain      |
| D8F12           | Cell Signaling Technology | Rabbit monoclonal   | 1:5000 (4.36 ng/ml)                    | 89.1-13310.20 / 0.98                      | Extracellular domain      |

\* AU: arbitrary unit of fluorescence; R<sup>2</sup>: linear regression coefficient.

**Supplementary Table 2.** HeCOG 10/05 cohort characteristics.

| <b>Parameter</b>           | <b>N (%)</b>        |
|----------------------------|---------------------|
| <b>All patients</b>        | 705                 |
| <b>Age (y) range 21-79</b> |                     |
| <50                        | 277 (39.2)          |
| ≥50                        | 428 (60.7)          |
| <b>Nodal Status</b>        |                     |
| Positive                   | 542 (76.9)          |
| Negative                   | 163 (23.1)          |
| <b>Tumor Size</b>          |                     |
| <2 cm                      | 218 (30.9)          |
| 2-5 cm                     | 437 (62.0)          |
| >5 cm                      | 50 (7.1)            |
| <b>ER status</b>           |                     |
| Positive                   | 545 (77.3)          |
| Negative (0)               | 159 (22.6)          |
| Unknown                    | 1 (0.1)             |
| <b>PgR status</b>          |                     |
| Positive (1-3)             | 479 (67.9)          |
| Negative (0)               | 226 (32.1)          |
| <b>HER2 status</b>         |                     |
| Positive (2-3)             | 189 (26.8)          |
| Negative (0-1)             | 516 (73.2)          |
| <b>Adjuvant treatment</b>  |                     |
| Chemotherapy               | 705 (100)           |
| Hormonotherapy             | 549 (77.9)          |
| Radiotherapy               | 521 (73.9)          |
| Trastuzumab                | 180 (25.5)          |
| <b>Follow-up (m)</b>       |                     |
| Median (range)             | 60.3 (0.43 – 78.98) |

**Supplementary Figure 1.** HER2 standardization tissue microarray (YTMA 263). A tissue microarray was built and designed using 80 breast cancer cases with CLIA-certified immunohistochemistry (IHC) and fluorescent *in situ* hybridization (FISH) information, non-tumor breast cancer tissue and breast cancer cell lines with known HER2 gene copy number. Cases with high HER2 protein expression group in the clinically-positive columns, as shown in **A** and **B** for CB11 using QIF and chromogenic IHC, respectively. AMP: amplified, NOT AMP: not amplified.

# SUPPLEMENTAL FIGURE 1

## HER2 CB11

### A

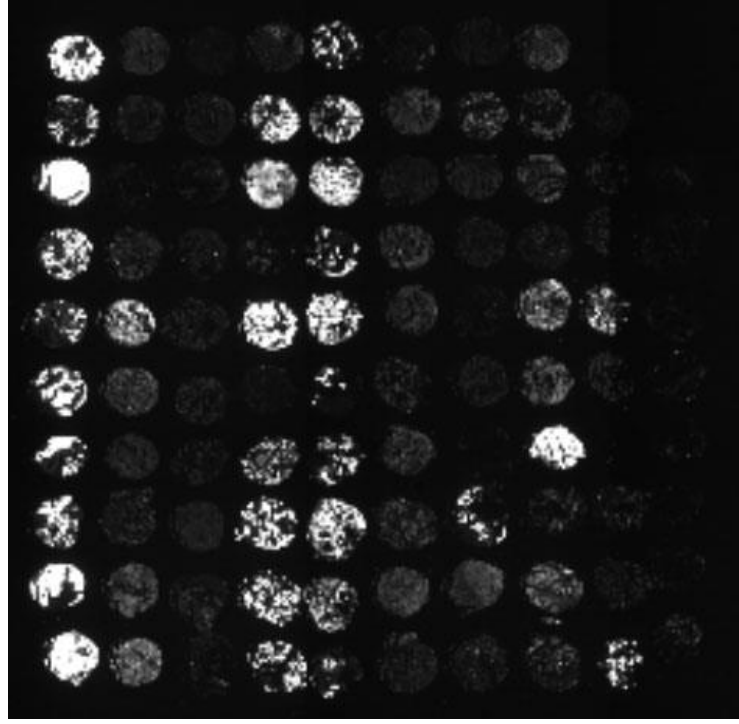

3+, AMP

1+, NOT AMP

0, NOT AMP

2+, AMP

3+, AMP

1+, NOT AMP

0, NOT AMP

2+, NOT AMP

CELL LINES

NORMAL  
BREAST TISSUE

### B

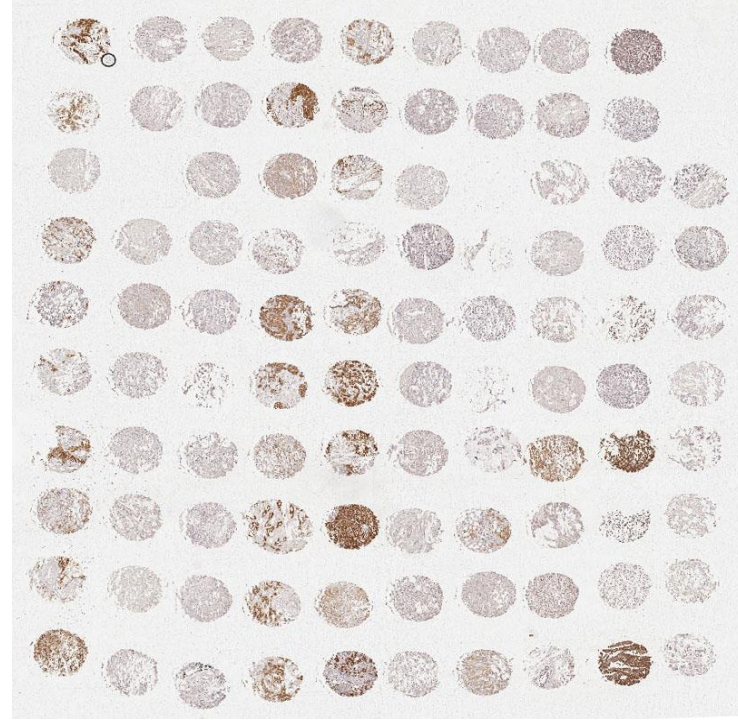

3+, AMP

1+, NOT AMP

0, NOT AMP

2+, AMP

3+, AMP

1+, NOT AMP

0, NOT AMP

2+, NOT AMP

CELL LINES

NORMAL  
BREAST TISSUE

**Supplementary Figure 2.** REMARK diagram detailing FFPE tissue availability and flow in the present study.

# SUPPLEMENTAL FIGURE 2

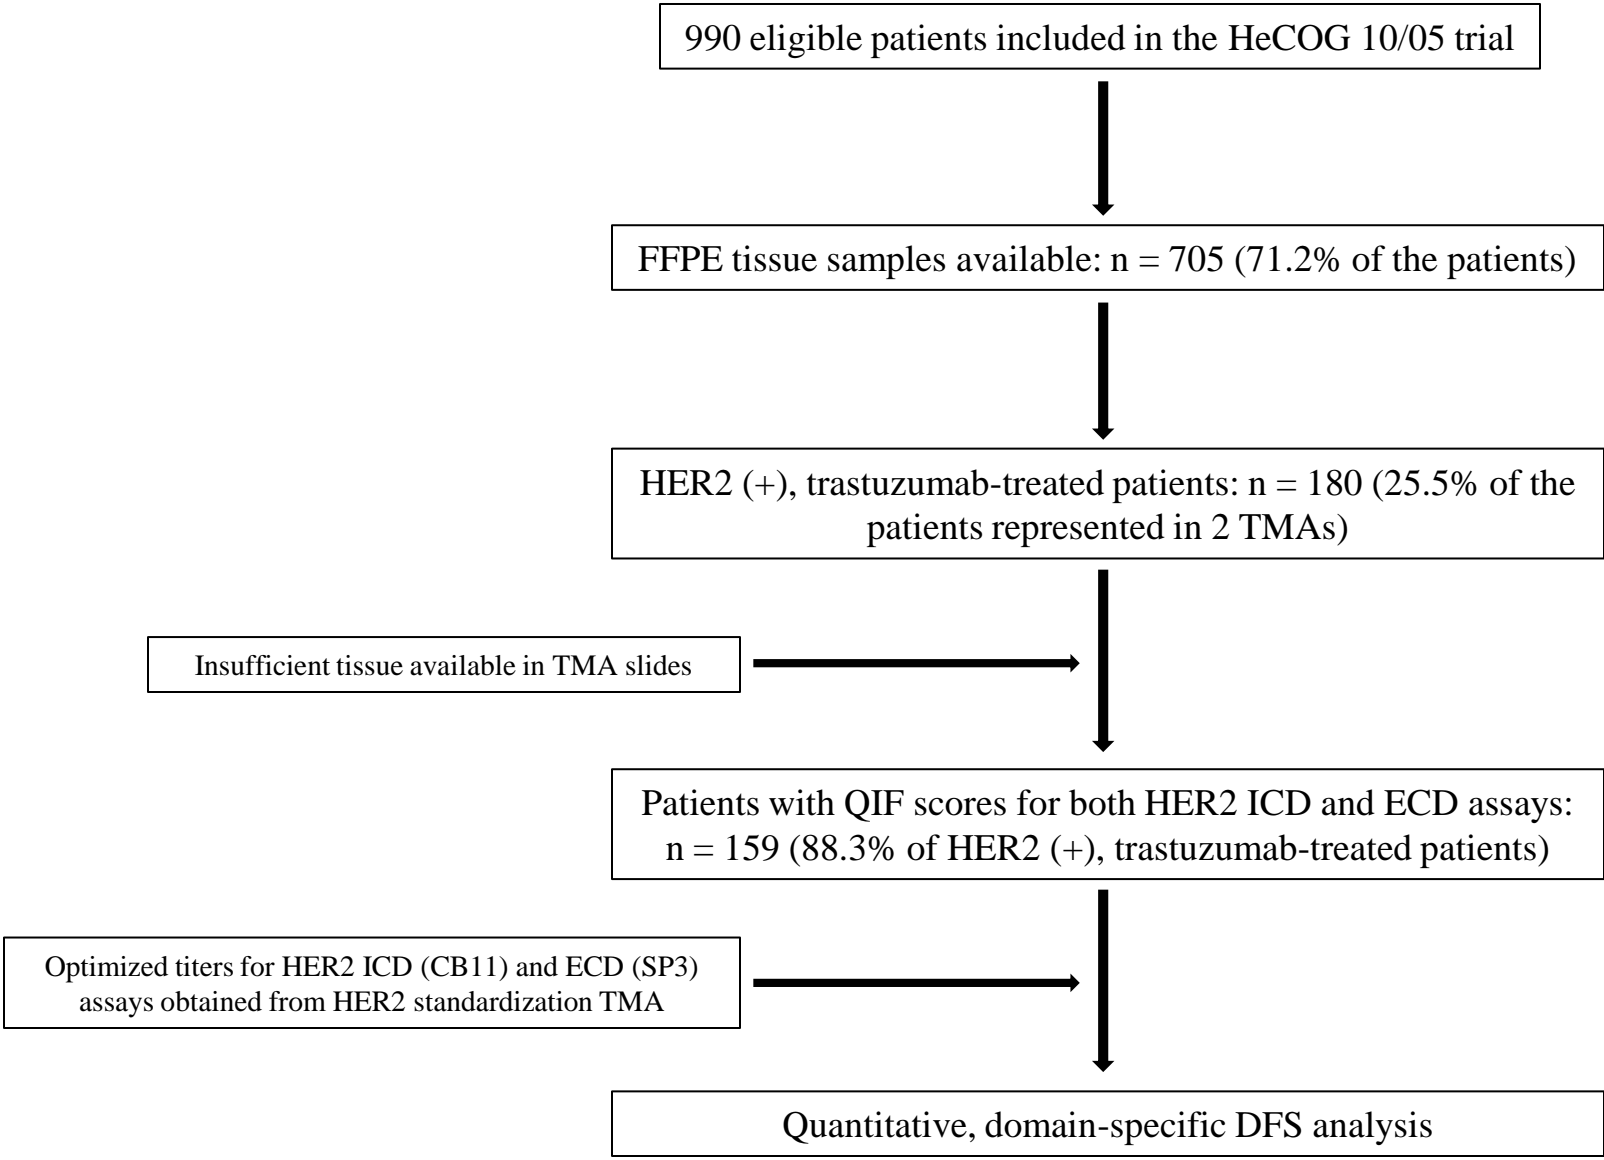

**Supplementary Figure 3.** Quantitative analysis of HER2 chromogenic immunohistochemistry in the HER2 standardization tissue microarray. Distribution of HER2 CB11 (A) and SP3 (B) scores obtained using optimized titer analysis with the Aperio algorithm. Joinpoint cut-point for diagnostic test evaluation was generated for each assay (red dotted lines).

# SUPPLEMENTAL FIGURE 3

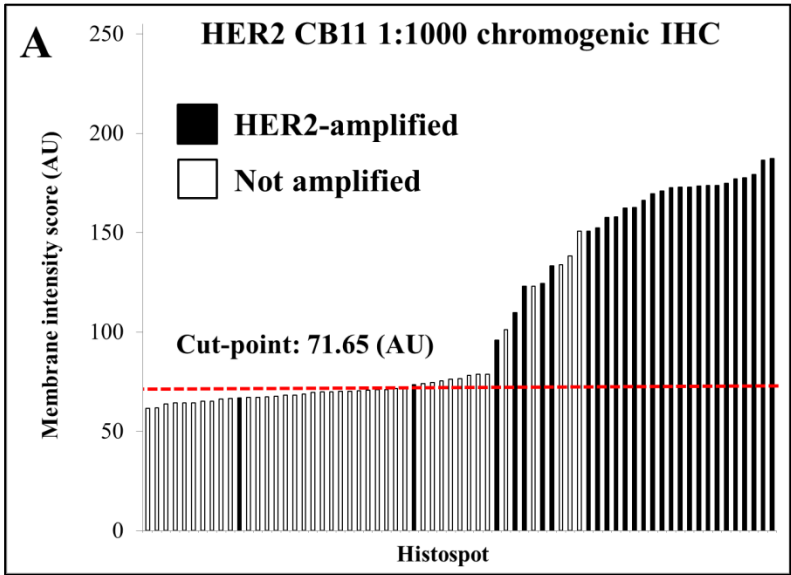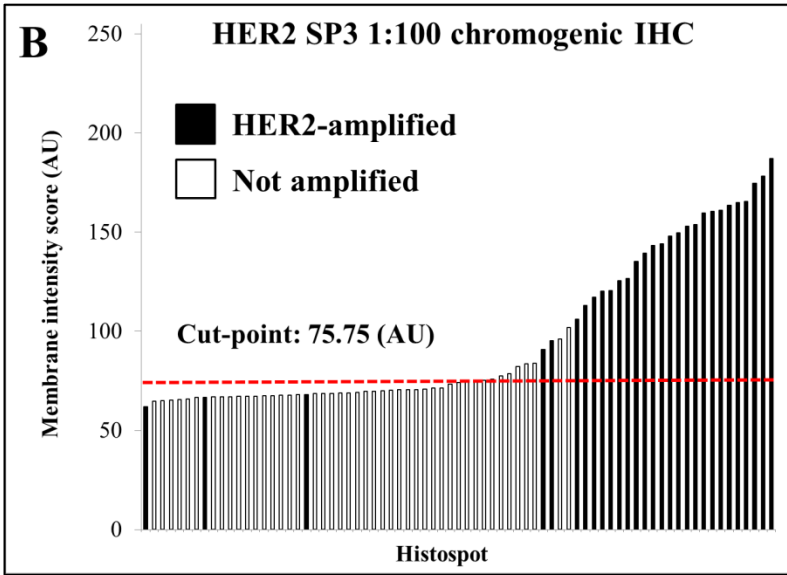

Supplement: supp_djv136_Supplementary_Materials.pdf [file supp_djv136_Supplementary_Materials.pdf]
